# Supplementary material for: Small RNA Profiling of Cucurbit Yellow Stunting Disorder Virus from Susceptible and Tolerant Squash (Cucurbita pepo) Lines
Source: MDPI journal article supplement (doi:10.3390/v15030788), 2023-03-19
Supplement: s1 [file s1]

## Supplementary Figure

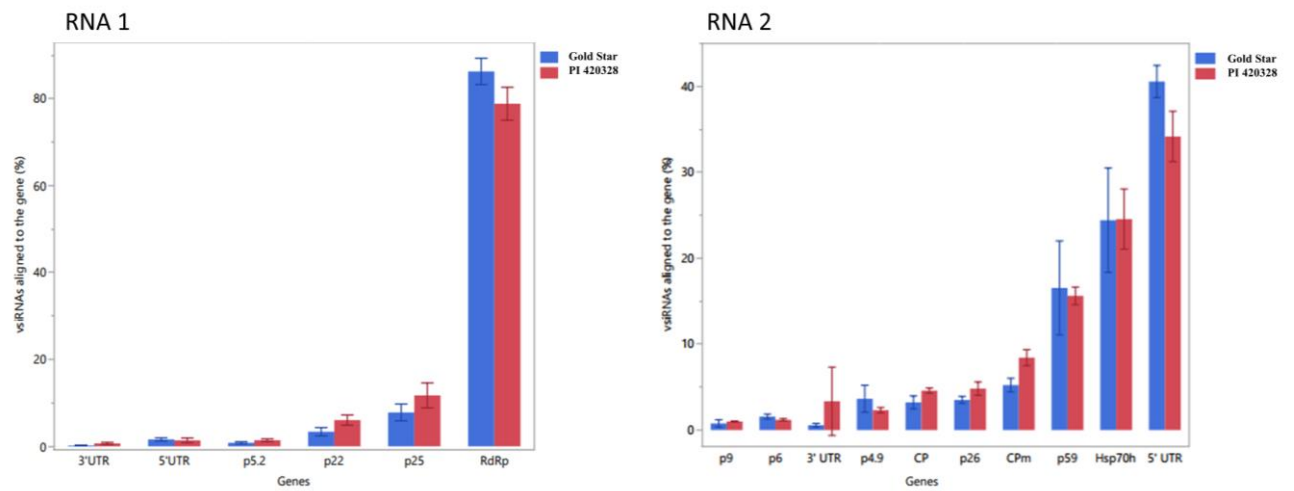

Figure S1. Accumulation of 21 to 25 nt virus-derived sRNAs per cistron in CYSDV in inoculated *Cucurbita pepo* leaves. Values are the average and standard error of three biological replicates and are represented as a percentage of total virus-derived sRNAs. Genes are arranged in order of their size on the x-axis. Each value is the average of three replicates with standard error bars.

Table S1: Read statistics from the nine small RNA libraries generated from CYSDV-infected Gold Star, PI 420328, and mock-inoculates.

| <b>Samples</b> | <b>Total reads</b> | <b>Adapter<br/>trimmed reads</b> | <b>20-24nt reads</b> | <b>Total reads<br/>aligned to CYSDV</b> |
|----------------|--------------------|----------------------------------|----------------------|-----------------------------------------|
| Mock-1         | 26,281,657         | 26,245,609                       | 4,024,031            | 1596                                    |
| Mock-2         | 23,239,317         | 23,211,374                       | 7,354,968            | 1712                                    |
| Mock-3         | 26,152,695         | 26,121,232                       | 16,092,407           | 4572                                    |
| PI 420328-1    | 22,033,282         | 22,016,803                       | 15,484,162           | 517129                                  |
| PI 420328-2    | 25,314,986         | 25,291,176                       | 18,791,162           | 641889                                  |
| PI 420328-3    | 23,754,847         | 23,735,568                       | 15,787,762           | 961098                                  |
| Gold Star-1    | 23,904,217         | 23,820,879                       | 6,744,415            | 928516                                  |
| Gold Star-2    | 110,334,924        | 110,246,449                      | 56,288,932           | 43223842                                |
| Gold Star-3    | 31,709,425         | 31,666,639                       | 17,501,754           | 9492950                                 |
